# Supplementary material for: Complementary Amplicon-Based Genomic Approaches for the Study of Fungal Communities in Humans
Source: PLoS One. 2015 Feb 23;10(2):e0116705. doi: 10.1371/journal.pone.0116705 (PMC4338280; doi:10.1371/journal.pone.0116705)
Supplement: S2 Table — (PDF) [file pone.0116705.s015.pdf]

**Table S2.** Complete taxonomic compositions (given as percentages of sequence reads) from sequencing.

[illegible]
